1 **Differential brain activity in visuo-perceptual regions during landmark-**  
2 **based navigation in young and healthy older adults**

3 Stephen Ramanoël<sup>1,\*†</sup>, Marion Durteste<sup>1,†</sup>, Marcia Bécu<sup>1</sup>, Christophe Habas<sup>2</sup>, Angelo Arleo<sup>1</sup>

4 <sup>1</sup> Sorbonne Université, INSERM, CNRS, Institut de la Vision, 17 rue Moreau, F-75012 Paris,  
5 France

6 <sup>2</sup> CHNO des Quinze-Vingts, DHU Sight Restore, INSERM-DHOS CIC, 28 rue de Charenton,  
7 75012 Paris, France

8 Number of figures: 6

9 Number of tables: 5

10 <sup>†</sup> Co-first authorship

11 **\*CA, Corresponding Author**

12 Dr. Stephen Ramanoël,

13 mail: [stephen.ramanoel@inserm.fr](mailto:stephen.ramanoel@inserm.fr)

## 14 **Abstract**

15 Older adults exhibit prominent impairments in their capacity to navigate, reorient in  
16 unfamiliar environments or update their path when faced with obstacles. This decline in  
17 navigational capabilities has traditionally been ascribed to memory impairments and  
18 dysexecutive function whereas the impact of visual aging has often been overlooked. The  
19 ability to perceive visuo-spatial information such as salient landmarks is essential to navigate  
20 in space efficiently. To date, the functional and neurobiological factors underpinning  
21 landmark processing in aging remain insufficiently characterized. To address this issue, this  
22 study used functional magnetic resonance imaging (fMRI) to investigate the brain activity  
23 associated with landmark-based navigation in young and healthy older participants. Twenty-  
24 five young adults ( $\mu=25.4$  years,  $\sigma=4.7$ ; 7F) and twenty-one older adults ( $\mu=73.0$  years,  
25  $\sigma=3.9$ ; 10F) performed a virtual navigation task in the scanner in which they could only orient  
26 using salient landmarks. The underlying whole-brain patterns of activity as well as the  
27 functional roles of scene-selective regions, the parahippocampal place area (PPA), the  
28 occipital place area (OPA), and the retrosplenial cortex (RSC) were analyzed. We found that  
29 older adults' navigational abilities were diminished compared to young adults' and that the  
30 two age groups relied on distinct navigational strategies to solve the task. Better performance  
31 during landmark-based navigation was found to be associated with increased neural activity in  
32 an extended neural network comprising several cortical and cerebellar regions. Direct  
33 comparisons between age groups further revealed that young participants had enhanced  
34 anterior temporal activity. In addition, young adults only were found to recruit occipital areas  
35 corresponding to the cortical projection of the central visual field during landmark-based  
36 navigation. The region-of-interest analysis revealed increased OPA activation in older adult  
37 participants. There were no significant between-group differences in PPA and RSC  
38 activations. These results hint at the possibility that aging diminishes fine-grained information  
39 processing in occipital and temporal regions thus hindering the capacity to use landmarks  
40 adequately for navigation. This work helps towards a better comprehension of the neural  
41 dynamics subtending landmark-based navigation and it provides new insights on the impact  
42 of age-related visuo-spatial processing changes on navigation capabilities.

43 Key words: Healthy Aging, Spatial Navigation, Landmark, fMRI, scene-selective regions.

## 44 **1. Introduction**

45           Demographically, the 21st century is characterized by an unprecedented increase in  
46 the number of older adults within the worldwide population. There were 703 million people  
47 aged 65 years or over in 2019 and this number is projected to more than double by 2050  
48 (United Nations, 2019). In parallel, we can expect a significant rise in the prevalence of  
49 neurodegenerative diseases such as Alzheimer's and Parkinson's diseases in the older  
50 population. In order to identify appropriate biomarkers, it is of critical importance that we  
51 gain a better understanding of brain changes in healthy aging. In this context, spatial  
52 navigation as a complex behavior encompassing perceptual and cognitive processes provides  
53 an ideal framework for the study of normal and pathological aging (Gazova et al., 2012;  
54 Lithfous et al., 2013; Allison et al., 2016; Laczó et al., 2017, 2018; Coughlan et al., 2018).

55           An extensive body of literature has highlighted a robust age-related decline in  
56 navigation ability in various species including rodents and non-human and human primates  
57 (Foster et al., 2012; Lester et al., 2017). Healthy older adults exhibit prominent impairments  
58 in their capacity to navigate efficiently, reorient or update their wayfinding behavior when  
59 faced with obstacles (Iaria et al., 2009; Moffat, 2009; Harris et al., 2012; Merhav et al., 2019).  
60 In real-world settings they are impaired at rapidly acquiring information about their  
61 surroundings leading to slower and more error-prone navigation than young adults (Kirasic,  
62 1991; Wilkniss et al., 1997). In virtual reality (VR) paradigms older adults also choose  
63 inefficient routes, underestimate distances and make frequent turning errors (Adamo et al.,  
64 2012). Studies in VR have shed light on an age-related shift in the use of navigation  
65 strategies: older adults favor response over place-based strategies (Rodgers et al., 2012). A  
66 place-based strategy involves the formation of mental map-like representations of the absolute  
67 spatial position of the goal in relation to various stimuli within the environment. A response-  
68 based strategy refers to the process whereby an association between a specific stimulus and  
69 the goal location is formed. The choice of a navigation strategy critically depends on the  
70 visual information present in the environment (Foo et al., 2005; Ratliff and Newcombe,  
71 2008). Indeed, successful navigation requires the perception and the integration of relevant  
72 spatial visual cues such as buildings or monuments, and the binding of these salient elements  
73 to directional information (Ekstrom, 2015; Epstein et al., 2017; Julian et al., 2018).

74           Spatial visual cues can be salient objects used as navigational landmarks or  
75 characteristics pertaining to the geometric shape of a space (Lester et al., 2017; Bécu et al.,  
76 2020). Landmarks can be conceptualized as discrete objects that are independent of the

77 environment's layout, such as a tree or a monument (Epstein and Vass, 2014). Landmarks'  
78 size, stability and proximity to the goal are among the key factors that influence their use for  
79 navigation (Stankiewicz and Kalia, 2007; Auger et al., 2012; Auger and Maguire, 2018).  
80 Geometric cues encompass all the elements that are intrinsic to and continuous with the  
81 external limits of a space; these include the overall layout, boundaries of the environment,  
82 wall lengths, and angle dimensions (Cheng and Newcombe, 2005; Tommasi et al., 2012;  
83 Giocomo, 2016). Several studies in virtual environments have emphasized the idea that old  
84 age hinders the ability to use landmark information for navigation (Picucci et al., 2009; Harris  
85 et al., 2012; Wiener et al., 2012; Zhong and Moffat, 2016; Hartmeyer et al., 2017). Bécu and  
86 colleagues (2020) recently elaborated on such results and unveiled a specific age-related  
87 deficit for landmark-based compared with geometry-based navigation in ecological settings.  
88 Older participants were found to be impaired in anchoring their spatial behavior to landmark  
89 information and relied preferentially on geometric cues when both types of visual spatial cues  
90 were informative.

91         Despite the extensive body of literature characterizing the neural underpinnings of  
92 human spatial navigation (for recent reviews see Chersi and Burgess, 2015; Spiers and Barry,  
93 2015; Epstein et al., 2017; Herweg and Kahana, 2018; Julian et al., 2018), few experiments  
94 have explored this question in the context of healthy aging. Indeed, only fifteen peer-reviewed  
95 neuroimaging studies have focused on spatial processing in normal aging and the majority of  
96 these studies have used structural analyses (Li and King, 2019). These studies highlight an  
97 age-related decline in place-based navigation associated with structural and functional  
98 changes to the hippocampus. A unique fMRI study has investigated the link between the use  
99 of visual spatial cues and the navigational skills of young and older adults (Schuck et al.,  
100 2015a). The authors combined computational modeling and fMRI during a virtual navigation  
101 task to examine how participants learned object locations relative to a circular enclosure or to  
102 a salient landmark. Young participants were found to use a hippocampal-dependent system  
103 for the representation of geometry (circular arena) and a striatal-dependent system for the  
104 representation of a landmark (traffic cone). It was further revealed that older participants  
105 relied on hippocampal structures for landmark-based navigation and that they were insensitive  
106 to geometric information provided by the environmental boundaries. This absence of reliance  
107 on geometric information is surprising considering the behavioral findings mentioned above,  
108 and could be related to the small field of view inherent to the scanner (Sturz et al., 2013).

109           Several other brains regions, known to be altered in healthy aging (Lester et al., 2017;  
110 Zhong and Moffat, 2018), have also been identified as key for the processing of relevant  
111 visual spatial cues for navigation (Epstein and Vass, 2014; Julian et al., 2018). Recently, there  
112 has been growing interest in unearthing the roles of the parahippocampal place area (PPA),  
113 the occipital place area (OPA), and the retrosplenial cortex (RSC), regions that respond to the  
114 presentation of visual scenes such as landscapes or urban environments. These scene-selective  
115 areas have been speculated to integrate incoming visual inputs with higher-level cognitive  
116 processes (for a review see Epstein et al., 2017; Julian et al., 2018). In brief, the PPA is  
117 sensitive to navigationally relevant cues (Janzen and van Turenout, 2004; Epstein, 2008) and  
118 may be implicated in the recognition of spatial context (Marchette et al., 2015); the OPA has  
119 been associated with the processing of local elements in scenes (Kamps et al., 2016) as well  
120 as with the representation of environmental boundaries (Julian et al., 2016); and the RSC is  
121 suggested to anchor heading information to local visual cues (for a recent review of RSC  
122 functions see Mitchell et al., 2018). Research exploring the neural activity within scene-  
123 selective regions in the context of aging is still in its infancy but evidence is accumulating for  
124 age-related alterations in these regions. Functional changes in the PPA have been linked to  
125 deficient processing of visual scenes (Ramanoël et al., 2015) and lower activations in the RSC  
126 of older adults have been associated with difficulties in switching between navigation  
127 strategies (Zhong and Moffat, 2018). The OPA's progression as a function of age has not been  
128 fully characterized, but recent findings from the host laboratory have hinted at its preserved  
129 connectivity with other navigational brain structures in healthy aging (Ramanoël et al., 2019).

130           Although behavioral studies have provided some evidence for differences in the use of  
131 landmark cues across the lifespan, there is a clear paucity of research exploring the functional  
132 and neurobiological factors responsible for the deterioration of landmark information  
133 processing in older age. To address this caveat, the present study used fMRI to investigate to  
134 what extent healthy aging influences behavior and neural activity associated with landmark-  
135 based navigation. A second objective consisted in deciphering the role played by scene-  
136 selective regions (PPA, OPA, RSC) in age-related landmark-based navigation deficits.

## 137 **2. Materials and methods**

### 138 **2.1 Participants**

139           Among the 25 young adults and 21 older adults who completed the experiment, 4  
140 older adults were excluded: 2 for a lack of task understanding and 2 for severe in-scanner

141 motion (movements > 5 mm across trials). Overall, 25 young adults (18 males;  $25.4 \pm 2.7$   
142 years) and 17 older adults (7 males;  $73.0 \pm 3.9$  years) were included in the analyses. The  
143 participants were part of the French cohort study *SilverSight* (~350 subjects) established in  
144 2015 at the Vision Institute, Quinze-Vingts National Ophthalmology Hospital, Paris. The  
145 battery of clinical and functional examinations used to enroll participants comprised an  
146 ophthalmological and functional visual screening, a neuropsychological evaluation, an  
147 oculomotor screening, an audio-vestibular assessment as well as a static/dynamic balance  
148 examination. The neuropsychological evaluation included the Mini Mental State Examination  
149 (MMSE; Folstein et al., 1975) and computerized versions of the 3D mental rotation test  
150 (Vandenberg and Kuse, 1978), perspective-taking test (Kozhevnikov and Hegarty, 2001) and  
151 Corsi block-tapping task (Corsi, 1973). Older participants had a score of 24<sup>1</sup> or higher on the  
152 MMSE. All subjects were right-handed, they had normal or corrected-to-normal vision, and  
153 they had no history of neurological or psychiatric disorders. Centration measurements and  
154 acuity were evaluated at least 2 weeks before the experimental session with a view to order  
155 MRI-compatible glasses for participants requiring visual correction (manufactured by  
156 *Essilor*). Participants gave their written informed consent to participate in the study, which  
157 was approved by the Ethical Committee "CPP Ile de France V" (ID\_RCB 2015-A01094-45,  
158 CPP N°: 16122).

## 159 **2.2 Virtual navigation task**

### 160 *2.2.1 The virtual environment*

161 The virtual navigation task was displayed on a MRI-compatible liquid crystal display  
162 monitor (NordicNeuroLab, Bergen, Norway) positioned at the head of the scanner bore.  
163 Participants viewed the screen (size: 69.84 cm (H) x 39.26 cm (V); pixels: 1920 x 1080) at a  
164 distance of 115 cm via a mirror fixed above the head-coil. The visible part of the screen  
165 subtended approximately 34 x 20 degrees of visual angle.

166 The virtual environment was programmed with Unity3D game engine (Unity  
167 Technologies SF; San Francisco, CA; <https://unity.com/>) and had participants navigate  
168 actively in a first-person perspective. The virtual environment was a three-arm maze (Y-  
169 maze) consisting of three corridors radiating out from a center delimited by homogenous  
170 wooden-like walls. Two configurations were designed. In the landmark condition all arms

---

<sup>1</sup> All older participants scored 28 or above on the MMSE except one participant who scored 24. We decided to include this subject nonetheless as his extended neuropsychological evaluation was normal and no significant changes were detected when removing him from the fMRI analyses

171 were 18 virtual meters (vm) long and equiangular. Three light gray-colored objects (a square,  
172 a triangle and a circle) were placed in front of each short wall at the center of the maze  
173 (Figure 1-A). In the control condition, the arms were 18 vm long and equiangular, and the  
174 maze was devoid of objects (Figure 1-B).

175 Participants navigated actively through the virtual environment with an MRI-  
176 compatible ergonomic two-grip response device (NordicNeuroLab, Bergen, Norway). They  
177 could move forward (thumb press), turn right (right index press) and turn left (left index  
178 press). A single finger press was necessary to initiate or stop movement. The forward speed of  
179 movement was set at 3 vm/s and the turning speed at 40°/s.

### 180 2.2.2 *Task design*

181 Prior to scanning, all participants familiarized themselves with the response device in  
182 an unrelated virtual space both outside and inside the scanner. They were required to navigate  
183 within a square open-field environment and to walk over a wooden board that appeared at  
184 different locations.

185 The scanning session during the navigation task was divided into three runs: an  
186 encoding phase and a retrieval phase for the landmark condition and a control condition. At  
187 the start of the encoding phase participants were positioned in the center of the maze  
188 randomly facing one of the three arms. They were instructed to find a goal (gifts) hidden at  
189 the end of one corridor and remember its location using the visual information available in the  
190 center of the environment (the three light gray-colored objects). The encoding phase lasted 3  
191 min to ensure that participants could explore all corridors. The retrieval phase in the same  
192 environment then began. In each trial participants were placed at the end of one of the two  
193 corridors that didn't contain the goal with their back against the wall. The starting positions  
194 across trials were pseudo-randomized across subjects. Participants were asked to navigate to  
195 the previously encoded goal location. Upon arrival at the end of the correct arm, the gifts  
196 appeared to indicate successful completion of the trial and a fixation cross on a gray screen  
197 was presented for an inter-trial interval of 3-8 s. Participants needed to complete seven trials.  
198 The control condition consisted of a retrieval phase only; it was designed to account for  
199 potential confounding factors such as motor and simple perceptual aspects of the task. It was  
200 always performed last and it comprised four trials. Subjects started from the end of an arm  
201 and moved to the center of the maze from where the target was readily visible. They were

202 instructed to navigate towards it. For both conditions, we recorded the trial duration and the  
203 response device use.

204 A short debriefing phase concluded the experimental session. Participants were probed  
205 on the strategy they used to orient in the landmark condition. They were asked to report how  
206 they solved the task: i) using one object, ii) using at least two objects, iii) randomly, iv) other  
207 strategy. Participants were deemed to be using a *place-based* strategy when their decision was  
208 based on two landmarks or more and to be using a *response-based* strategy when their  
209 decision was based on a single visual spatial cue (Iaria et al., 2003; Iglói et al., 2010, 2014;  
210 Chrastil, 2013; Gazova et al., 2013; Packard and Goodman, 2013; Colombo et al., 2017;  
211 Laczó et al., 2017). No participants answered that they oriented randomly or that they used a  
212 different strategy.

### 213 **2.3 Functional localizer experiment**

214 A block fMRI paradigm was used to locate scene-selective areas (Ramanoël et al.,  
215 2019). Scene-selective areas comprise the parahippocampal place area (PPA), the occipital  
216 place area (OPA) and the retrosplenial cortex (RSC). Participants were presented with blocks  
217 of 900 x 900 pixel grayscale photographs (18 x 18 degrees of visual angle) representing  
218 scenes, faces, everyday objects, and scrambled objects. The functional run lasted 4 min 40 s  
219 and it was composed of fourteen 20-s task blocks (4 blocks of scenes, 2 blocks of faces, 2  
220 blocks of objects, 2 blocks of scrambled objects, and 4 blocks of fixation). Each stimulus was  
221 presented for 400 ms followed by a 600 ms inter-stimulus interval. Participants performed a  
222 “one-back” repetition detection task.

### 223 **2.4 MRI Acquisition**

224 Data were collected using a 3 Tesla Siemens MAGNETOM Skyra whole-body MRI  
225 system (Siemens Medical Solutions, Erlangen, Germany) equipped with a 64-channel head  
226 coil at the Quinze-Vingts National Ophthalmology Hospital in Paris, France. T2\*-weighted  
227 echo-planar imaging (EPI) sequences, optimized to minimize signal dropout in the medial  
228 temporal region (Weiskopf et al., 2006), were acquired for functional imaging during the  
229 navigation task (voxel size = 3 x 3 x 2 mm, TR/TE/flip angle = 2685 ms/30 ms/90°, interslice  
230 gap = 1 mm, slices = 48, matrix size = 74 x 74, FOV = 220 x 220 mm). For the localizer  
231 experiment, 284 volumes from 64 slices were acquired using a T2\*-weighted simultaneous  
232 multi-slice echo planar sequence (SMS-EPI; voxel size = 2.5 x 2.5 x 2.4 mm, TR/TE/flip



233 angle = 1000 ms/30 ms/90°, matrix size = 100 x 100, SMS = 2, GRAPPA = 2). The  
234 anatomical volume consisted of a T1-weighted, high-resolution three-dimensional MPRAGE  
235 sequence (voxel size = 1 x 1 x 1.2 mm, TR/TE/IT/flip angle = 2300 ms/2.9 ms/900 ms/9°,  
236 matrix size = 256 x 240 x 176).

## 237 **2.5 Statistical analyses of behavioral data**

238 Normality of data was assessed graphically with quantile-quantile plots and  
239 numerically with the Shapiro-Wilk test. Descriptive characteristics and cognitive measures  
240 were compared across age groups using independent samples t-test for normally distributed  
241 continuous data, Mann-Whitney U tests for non-normally distributed continuous data and chi-  
242 square test of independence for categorical data. Navigation performance (time to reach the  
243 goal, error rate) was compared across age group and sex with Mann-Whitney U tests. A  
244 logistic regression adjusted for sex was conducted to examine the relationship between age  
245 and strategy use in the landmark condition.

## 246 **2.6 Preprocessing and statistical analyses of fMRI data**

### 247 *2.6.1 Whole brain analyses*

248 FMRI data analysis was performed using a combination of SPM12 release 7487  
249 (Wellcome Department of Imaging Neuroscience, London, UK) and ArtRepair toolbox  
250 (Mazaika et al., 2009) implemented in MATLAB 2015 (Mathworks Inc., Natick, MA, USA).  
251 The first five functional volumes of the encoding, retrieval and control runs were discarded to  
252 allow for equilibration effects. Slice-timing correction was applied and functional images  
253 were realigned to the mean functional image using a rigid body transformation. Artefacts  
254 related to motion were then examined with ArtRepair. Two older subjects were subsequently  
255 excluded. Volumes displaying elevated global intensity fluctuation (> 1.3%) and movement  
256 exceeding 0.5 mm/TR were repaired using interpolation from adjacent scans. The T1-  
257 weighted anatomical volume was then realigned to match the mean functional image of each  
258 participant and normalized to the Montreal Neurological Institute (MNI) space using a 4<sup>th</sup>  
259 degree B-Spline interpolation. The anatomical normalization parameters were subsequently  
260 used for the normalization of functional volumes. Each functional scan was smoothed with an  
261 8 mm FWHM (Full Width at Half Maximum) Gaussian kernel. The preprocessed images  
262 were visually inspected to ensure that there were no realignment or normalization issues.

263 Statistical analysis was performed using the general linear model for block design at  
264 the single participant level (Friston et al., 1995). The seven trials of the retrieval phase in the  
265 landmark condition, the four trials of the control condition and fixation times were modeled as  
266 regressors, constructed as box-car functions and convolved with the SPM hemodynamic  
267 response function (HRF). The encoding phase was not included in the analysis as its duration  
268 differed greatly between participants. Time to reach the goal by trial, grip response during  
269 navigation, and movement parameters derived from the realignment correction (three  
270 translations and three rotations) were entered in the design matrix as regressors of no-interest.  
271 Time series for each voxel were high-pass-filtered (1/128 Hz cutoff) to remove low-frequency  
272 noise and signal drift. Individual contrasts were submitted to a multiple regression and a two-  
273 samples t-test. Sex and total brain volume were included as covariates in the regression and  
274 total brain volume was included as a covariate in the two-samples t-test (see section 3.1).  
275 Areas of activation were tested for significance using a statistical threshold of  $p < 0.001$   
276 uncorrected at voxel-level, with a minimum cluster extent of  $k = 10$  voxels (Iglói et al., 2010,  
277 2014; Sutton et al., 2010; Schuck et al., 2015a; Javadi et al., 2017).

#### 278 2.6.2 *Region of interest analyses*

279 Data from the localizer experiment were analyzed using SPM12. For each participant,  
280 the first 4 functional localizer volumes were discarded and the remaining images were  
281 realigned, co-registered to the T1-weighted anatomical image, normalized to the MNI space  
282 and smoothed using an 8 mm FWHM Gaussian kernel. Slice-timing correction was not  
283 applied following recommendations from the Human Connectome Project functional  
284 preprocessing pipeline for multi-slice sequences (Glasser et al., 2013). The localizer images  
285 were analyzed using a single participant general linear model for block design. Five  
286 conditions of interest (scenes, faces, objects, scrambled objects, fixation) were modeled as  
287 five regressors and convolved with a canonical HRF. Movement parameters were included in  
288 the model as regressors of no interest and each voxel's time-series was high-pass-filtered  
289 (1/128 Hz cutoff).

290 PPA, OPA and RSC regions were located independently for each participant using the  
291 fMRI contrast [Scenes > (Faces + Objects)]. Significant voxel clusters on individual t-maps  
292 were identified using family-wise error correction (FWE) for multiple comparisons ( $\alpha =$   
293 0.05). Mask ROIs were created as the 40 contiguous voxels with the highest t-values around  
294 the peaks of activation from the left and right hemispheres. The two 40-voxel regions from

295 each hemisphere were subsequently summed into a single 80-voxel ROI. Mean parameter  
296 estimates for the contrast [Landmark > Control] were extracted from the three mapped ROIs  
297 using the REX MATLAB-based toolkit. The mean values from each ROI were compared  
298 between young and older subjects using two samples t-test and significance was set at  $p <$   
299 0.0083 after Bonferroni correction for multiple comparisons ( $p = 0.05/(3 \times 2)$ ).

### 300 **3. Results**

#### 301 **3.1 Behavioral results**

302 Data from 25 young and 17 older participants were analyzed. Neuropsychological  
303 assessments showed that older adults had significantly poorer performance than young adults  
304 across all measures. Descriptive and cognitive characteristics are summarized in Table 1.

305 Navigation performance across age groups is presented in Figure 2. We found that  
306 older adults chose the wrong corridor in 10% of trials while young adults made no errors ( $X^2$   
307 (1,  $N = 42$ ) = 12.35,  $p = 0.006$ ; Figure 2A). In addition, older subjects were significantly  
308 slower to reach the goal in the landmark condition than younger subjects (mean  $\pm$  SEM: 19.85  
309 s  $\pm$  1.67 vs 11.97 s  $\pm$  0.13;  $U(40) = 5.267$ ,  $p < 0.001$ ; Figure 2B). There was no sex effect on  
310 navigation time, defined by the average time to reach the goal, in each age group separately.  
311 However, when data from both age groups were pooled women's navigation time appeared to  
312 be significantly longer than men's (17.75 s  $\pm$  1.88 s vs 13.40 s  $\pm$  0.64 s;  $U(40) = 2.294$ ,  $p =$   
313 0.022). Sex and total intracranial volume were therefore included as covariates in the fMRI  
314 multiple regression analyses. We further found that age was a significant predictor of strategy  
315 use ( $R^2 = 0.967$ ,  $p = 0.048$ ). Older adults were less likely to rely on a place-based strategy  
316 during landmark-based navigation than younger adults (Figure 2C).

#### 317 **3.2 Whole-brain**

##### 318 *3.2.1 Multiple regression analyses*

319 To locate the brain regions related to navigation performance, we first examined the  
320 association between both groups' navigation time and patterns of brain activity for the fMRI  
321 contrast [Landmark > Control]. We observed a negative association between navigation time  
322 and neural activity in many clusters across the brain (Table 2 and Figure 3) including frontal  
323 (right superior and middle gyri), temporal (middle, inferior, lingual and parahippocampal  
324 gyri), parietal (left angular gyrus including the inferior parietal lobule) and occipital cortices  
325 (left superior occipital gyrus) as well as in the cerebellum (lobule VI and vermis). Temporal

326 activations in the left hemisphere comprised the posterior part of the hippocampus: CA1 and  
327 the Dentate Gyrus ( $x=-24$ ,  $y=-46$ ,  $z=5$  and  $x=-36$ ,  $y=-43$ ,  $z=-4$ ). Other activations included the  
328 ventral temporal cortex ( $x=45$ ,  $y=8$ ,  $z=-37$  and  $x=54$ ,  $y=5$ ,  $z=-34$ ) and the visual area V3A  
329 ( $x=-21$ ,  $y=-97$ ,  $z=23$ ) that is part of the dorsal visual stream. The inverse association did not  
330 elicit any significant brain activations. Complementary analyses revealed a negative  
331 association between age and patterns of neural activity in the left superior temporal gyrus only  
332 ( $x=-45$ ,  $y=-1$ ,  $z=-16$ ) for the fMRI contrast [Landmark > Control]. The latter finding suggests  
333 that the negative association between navigation time and temporal activations previously  
334 reported is largely driven by age.

335 We then investigated the relationship between navigation time and neural activity in  
336 each age group separately (Table 2). In the young participant group, navigation performance  
337 was associated with neural activity in the left superior frontal gyrus and in the right precentral  
338 gyrus. In the older participant group, results revealed a main cluster in the left angular gyrus,  
339 including the inferior parietal lobule, as well as a small cluster encompassing the brainstem  
340 and the parahippocampal gyrus.

### 341 3.2.2 *Two-sample analyses*

342 Results for the within-group and between-group analyses are shown in Table 3 and  
343 Figure 4. We first contrasted brain activity during the landmark condition with activity during  
344 the control condition [Landmark > Control] for each age group individually. For young  
345 participants, we found significant clusters in the superior and inferior temporal gyri of the left  
346 hemisphere, which included the amygdala and hippocampus, in the middle and inferior  
347 occipital gyri bilaterally and in the right cerebellum (Crus I-II). In the older participant group,  
348 the fMRI contrast [Landmark > Control] did not elicit any significant activation. Direct  
349 comparisons between age groups revealed significant results for the fMRI contrast [Young >  
350 Old] but not for the contrast [Old > Young]. Young participants exhibited stronger activity in  
351 the left inferior temporal gyrus, comprising the amygdala and hippocampal regions, than older  
352 subjects.

353 The absence of activation in the older adult group prompted us to conduct further  
354 analyses. We first investigated the cognitive cost of the control condition in each age group by  
355 comparing cerebral activations for the fMRI contrast [Control > Fixation]. The group  
356 comparison [Young > Old] showed no significant activation. However, the inverse group  
357 comparison [Old > Young] revealed extended activations in the right precuneus, the right

358 superior temporal gyrus, the right supramarginal gyrus and superior parietal lobule as well as  
359 several bilateral frontal regions (Table 4). These results hint at the possibility that the control  
360 condition was cognitively more demanding for older participants than for young participants.  
361 We performed a second group comparison with the fMRI contrast [Landmark > Fixation]  
362 using a conservative cluster-level FWE correction  $p < 0.05$ . Significant activations were  
363 reported for the [Old > Young] comparison only, and included the middle frontal and superior  
364 parietal gyri in each hemisphere, the left supramarginal gyrus as well as the right cerebellum  
365 (Table 5).

### 366 **3.3 Regions of interest**

367 The PPA, OPA and RSC ROIs were defined for each individual based on the  
368 independent localizer experiment. We first examined age-related differences in average  
369 parameter activity for the fMRI contrast [Landmark > Control]. No significant differences  
370 were found. We conducted a second analysis based on the fMRI contrast [Landmark >  
371 Fixation]. The group comparison revealed significantly enhanced OPA activity in older adults  
372 compared with young adults after adjusting for multiple comparisons (mean  $\pm$  SEM:  $2.19 \pm$   
373  $0.27$  vs.  $1.07 \pm 0.21$ ;  $t = -3.4$ ,  $p = 0.002$ ). No significant differences were observed in the  
374 activity of the PPA and RSC between young and older participants (Figure 5).

## 375 **4. Discussion**

376 The present fMRI study examined age-related differences in landmark-based  
377 navigation using a non-ambiguous Y-maze reorientation paradigm. The task was designed to  
378 limit the influence of mnemonic and motor components in order to gain a specific  
379 understanding of the neural bases subtending visual spatial cue reliance in young and healthy  
380 older adults.

### 381 *Behavior*

382 We first replicated well-established findings and showed that older adults had lower  
383 scores than their younger counterparts on visuo-spatial cognitive neuropsychological  
384 measures, including the perspective-taking, 3D mental rotation and Corsi block-tapping tasks  
385 (Ohta et al., 1981; Clancy Dollinger, 1995; Iachini et al., 2005; Techentin et al., 2014). These  
386 tests are known to be good predictors of general navigation skills and their decline with age  
387 may account in part for older adults' deficient navigation performance (Zhong and Moffat,  
388 2016). Notably, perspective-taking, mental rotation, and spatial memory are important

389 abilities for spatial learning and for the dynamic manipulation of sensory information during  
390 navigation (Allen et al., 1996; Kozhevnikov et al., 2006; Meneghetti et al., 2018; Muffato et  
391 al., 2020).

392 Consistent with past literature, we found that older subjects' navigation performance  
393 was significantly poorer than young subjects' and we reported a bias for response-based  
394 strategies in older adults (Moffat and Resnick, 2002; Harris and Wolbers, 2012; Rodgers et  
395 al., 2012; Gazova et al., 2013; Wiener et al., 2013; Schuck et al., 2015b; van der Ham et al.,  
396 2015; Zhong and Moffat, 2016; Kimura et al., 2019; Merhav and Wolbers, 2019; Bécu et al.,  
397 2020). This navigation strategy preference appeared to be associated with older age. However,  
398 we cannot exclude the possibility that the differential proportion of women in the two age  
399 groups (young: 28% vs. old: 59%) partly accounted for the increased use of response-based  
400 strategies in older adults (Perrochon et al., 2018). Notwithstanding these age-related  
401 differences, it is important to mention that older participants achieved a high level of  
402 performance on the task and made few errors. We argue that this result stemmed from the  
403 simplicity of the virtual environment that contained a unique junction and three proximal  
404 landmarks (Moffat and Resnick, 2002; Caffo et al., 2018). Moreover, both place- and  
405 response-based strategies could be used to successfully complete the task.

#### 406 *Whole-brain*

407 In accordance with previous neuroimaging studies looking at the neural bases of  
408 spatial navigation, we found that landmark-based navigation recruited an extended network of  
409 brain regions (Kuhn and Gallinat, 2014; Spiers and Barry, 2015b; Coughlan et al., 2018; Cona  
410 and Scarpazza, 2019).

411 This network spanned posterior structures linked to visuo-spatial processing. We  
412 reported activation of the left superior occipital gyrus which corresponds to visual area V3A  
413 and is involved in optic flow tracking for visual path integration (Sherrill et al., 2015; Zajac et  
414 al., 2019). In addition, our landmark-based navigation paradigm elicited activity in the ventral  
415 temporal cortex. The latter is known to process high-level visual information such as object  
416 quality (Kravitz et al., 2013; Nau et al., 2018). The recruited network also encompassed the  
417 posterior section of the hippocampus and the parahippocampal gyrus; brain areas that play a  
418 central role in spatial navigation and that are particularly active during immediate retrieval  
419 phases of navigation paradigms (Kuhn and Gallinat, 2014; Cona and Scarpazza, 2019).  
420 Furthermore, we found significant activity in the angular gyrus, a region of the posterior

421 parietal cortex known to encode landmarks in the environment with respect to the self  
422 (Ciaramelli et al., 2010; Auger and Maguire, 2018). Our task also prompted activation of the  
423 prefrontal cortex which is thought to contribute to spatial working memory during active  
424 navigation (Wolbers and Hegarty, 2010; Ito, 2018). It thus appears that accurate landmark-  
425 based navigation required the integration of objects within a first-person framework and the  
426 maintenance of such representations in working memory (Sack, 2009; Seghier, 2012; Miniaci  
427 and De Leonibus, 2018). Finally, we found that lobule VI and the vermis of the right  
428 cerebellum were active during landmark-based navigation. This finding is in accordance with  
429 the cerebellum's postulated role in cognitive aspects of spatial navigation (Rocheffort et al.,  
430 2013). We must nonetheless acknowledge the eventuality that cerebellar activity reflected  
431 sensory-motor processing such as the degree of motor learning or eye and finger movements  
432 (Bo et al., 2011; Igloi et al., 2015).

433         Importantly, older participants were found to over-recruit superior parietal regions  
434 compared to young participants. One could speculate that the increased bilateral activity in the  
435 angular gyrus drove the encoding of landmarks in a first-person perspective leading to a bias  
436 for response strategies in the older adult group. This is consistent with the observed age-  
437 related reduction in temporal activity. Indeed, changes in strategy preference with advancing  
438 age have been extensively documented and they are thought to be mediated by a shift from  
439 the hippocampal regions towards other cerebral structures such as the parietal cortex (Rodgers  
440 et al., 2012; Wiener et al., 2013). Within this framework of interpretation, older adults'  
441 increased cerebellar activity could also reflect a change in strategy preference as recent  
442 evidence has implicated the cerebellum in the mediation of response-based strategies (Igloi et  
443 al., 2015). Older participants further displayed enhanced activation of frontal cortices. Various  
444 authors have stressed the impact of age-related modifications in the prefrontal cortex on  
445 hippocampal and striatal dynamics, which could contribute to impaired strategy  
446 implementation and switching (Lester et al., 2017; Goodroe et al., 2018; Zhong and Moffat,  
447 2018). In contrast to previous studies that reported striatal activity during response-based  
448 navigation, our results did not show increased striatal activity in the older adult group  
449 (Konishi et al., 2013; Schuck et al., 2015b). Such a difference may be explained by the high  
450 proportion of young adults using response-based strategies in our task. Worthy of note, the  
451 differential patterns of neural activity observed in the young and older participant groups may  
452 be partially due to age-related cognitive and motor differences. Although we tailored the  
453 duration of the familiarization phase to each subject's needs and controlled for response

454 device use, we cannot omit the potential influence of older adults' lesser familiarity with new  
455 technologies and declining executive functions. For example, the lack of activity elicited by  
456 the contrast [Landmark > Control] in older subjects could reflect the deficient integration of  
457 new instructions when switching between tasks (Hirsch et al., 2016).

458 Of interest, whole-brain analyses revealed that young adults recruited the cortical  
459 projections of the central visual field in posterior occipital regions (Figure 6, MNI coordinates  
460 left:  $x=-24, y=-49, z=2$  and right:  $x=30, y=-49, z=2$ ). The latter brain area is dedicated to fine-  
461 grained visual perception such as object recognition (Wandell et al., 2005; Kauffmann et al.,  
462 2014). Exploratory between-group analyses showed that the fMRI contrast [Landmark]  
463 elicited more activity in anterior occipital regions (MNI coordinates  $x=6, y=-73, z=-1$ ) that  
464 respond to the peripheral visual field in older participants than in young participants (Figure  
465 6). Previous neuroimaging studies have uncovered specific age-related changes in the  
466 occipital regions associated with central visual field processing and a relative preservation of  
467 areas associated with peripheral visual field processing (Brewer and Barton, 2012; Ramanoël  
468 et al., 2015). Additionally, group comparisons revealed that young subjects had more activity  
469 in the anterior section of the inferior temporal gyrus than older subjects. As mentioned  
470 previously, the anterior temporal cortex is critical for perceptual recognition and visual object  
471 processing (Litman et al., 2009). Our findings are therefore consistent with recent evidence  
472 highlighting deficient fine-grained processing of sensory information in older adults and  
473 emphasize the importance of acute object discrimination for landmark-based navigation and  
474 episodic memory (Burke et al., 2018; Greene and Naveh-Benjamin, 2020). Taken together,  
475 the above results suggest that occipital and temporal regions involved in the representation of  
476 fine-grained information are particularly disrupted in older age. Further research is warranted  
477 to determine whether the age-related decline in orientation skills could stem from the less  
478 efficient processing of visual spatial cues.

#### 479 *Scene-selective regions*

480 Given the predominant role of visual perception in human spatial navigation (Ekstrom,  
481 2015; Nau et al., 2018), there has been heightened interest in the PPA, RSC and OPA and  
482 their respective contributions to landmark processing (Epstein et al., 2017; Julian et al., 2018).  
483 Our results pointed to greater OPA activity in older participants compared with younger  
484 participants which is in line with recent work showing a higher functional connectivity around  
485 the OPA in older adults (Ramanoël et al., 2019). The OPA is known to be sensitive to self-  
486 perceived distance and motion (Persichetti and Dilks, 2016) and to extract the navigational



487 affordances of the local visual scene from a first-person perspective (Bonner and Epstein,  
488 2017). Critically, these self-centered navigation skills are relatively well preserved in healthy  
489 aging (Moffat, 2009). In line with the over-activation of the parietal cortex in older adults, one  
490 could conceive that the increased OPA activation in the older adult group reflects a  
491 compensatory mechanism to offset the reduced activity in the temporal cortex, thus mitigating  
492 age-related place learning deficits. As a side note, considering that the OPA has been causally  
493 linked to the processing of environmental boundaries (Julian et al., 2016), our result offers a  
494 potential explanation for older adults' preferential reliance on geometric information in an  
495 ecological cue conflict paradigm (Bécu et al., 2020).

496 Surprisingly, we did not find differences in the activity of the RSC across age groups.  
497 Previous work has demonstrated an age-related decline in RSC activation during spatial  
498 navigation tasks (Meulenbroek et al., 2004; Moffat et al., 2006; Antonova et al., 2009). The  
499 RSC is known to mediate several cognitive functions pertaining to spatial navigation (Vann et  
500 al., 2009; Mitchell et al., 2018) including translation between reference frames and  
501 recollection of visual landmarks (Auger et al., 2015). The discrepancy between our results and  
502 those from the literature could be explained by the relative simplicity of our task. In contrast  
503 to previous research conducted with young adults, our paradigm strived to restrict mnemonic  
504 processing and comprised only three stable, salient and simple landmarks located at a single  
505 intersection (Wolbers and Büchel, 2005; Auger et al., 2012; Auger and Maguire, 2018).  
506 Another probable explanation lies in the idea that functional and structural changes to the  
507 RSC have been proposed to be more pronounced in pathological aging than normal aging  
508 (Fjell et al., 2014; Dillen et al., 2016).

509 Finally, we reported a weak recruitment of the PPA during landmark-based navigation  
510 with no significant difference across age groups. Previous studies have found the PPA to be  
511 involved in encoding the navigational relevance of objects for orientation (Janzen and van  
512 Turennout, 2004) and in landmark recognition (Epstein and Vass, 2014). As previously noted,  
513 our virtual environment comprised a small number of simple and non-ambiguous objects, the  
514 lack of activity in the PPA is thus unsurprising. In addition, two recent studies de-emphasized  
515 PPA's contribution to active navigation and highlighted its specificity for place recognition  
516 (Persichetti and Dilks, 2018, 2019). Research exploring the neural activity within scene-  
517 selective regions in the context of aging is still in its infancy. Future studies are needed to  
518 better characterize age-related changes in brain areas implicated in processing both the visual  
519 and cognitive properties of spatial cues.

## 520 *Limitations*

521           The current study has several limitations. First, we focused exclusively on the retrieval  
522 phase as the encoding phase proved to be too heterogeneous across participants. It would be  
523 of immediate interest to assess the influence of various visuo-perceptual modulations, such as  
524 the visibility of spatial cues, on the quality of spatial encoding. Second, although spatial  
525 navigation is reliant upon multiple sources of sensory information, fMRI spatial navigation  
526 paradigms only allow for visual input signals. Active walking as part of ecological study  
527 designs would provide proprioceptive and self-motion feedback signals as well as an  
528 improved field of view to participants. Such studies are necessary to complement the present  
529 findings. Previous research has indeed shown that navigation performance in older subjects is  
530 tightly coupled to the availability of multiple sources of sensory information (Adamo et al.,  
531 2012). Finally, future studies should take into consideration the role of sex and should include  
532 an intermediate age group in order to gain a finer understanding of the neural dynamics  
533 subtending spatial navigation across the lifespan (Grön et al., 2000; van der Ham and  
534 Claessen, 2020).

## 535 **5. Conclusion**

536           To conclude, the present study shed light on the possibility that navigational deficits in  
537 old age are linked to functional differences in brain areas involved in visual processing and to  
538 impaired representations of landmarks in temporal regions. This work helps towards a better  
539 comprehension of the neural dynamics subtending landmark-based navigation and it provides  
540 new insights on the impact of age-related spatial processing changes on navigation  
541 capabilities. We argue that approaching the study of spatial navigation in healthy and  
542 pathological aging from the perspective of visuo-perceptual abilities is a critical next step in  
543 the field. Neuroimaging methods coupled with virtual reality paradigms open up promising  
544 avenues to investigate age-related changes in navigation ability and to evaluate the benefits of  
545 training programs on older adults' spatial autonomy and mobility.

## 546 **Author Contributions**

547 Study design: SR, MB, CH, AA; Data acquisition: SR, MD; Data processing: SR, MD;  
548 Manuscript writing: SR, MD, MB, AA.

## 549 **Conflict of Interest Statement**

550 The authors declare that the research was conducted in the absence of any commercial or  
551 financial relationships that could be construed as a potential conflict of interest.

## 552 **Funding**

553 This research was supported by ANR – Essilor SilverSight Chair ANR-14-CHIN-0001.

## 554 **Acknowledgments**

555 The authors would like to express their gratitude to the men and women who took part in this  
556 study. We thank the Quinze-Vingts Hospital for allowing us to acquire the MRI data. We  
557 thank Konogan Baranton and Isabelle Poulain (*Essilor*) for the manufacturing of MRI-  
558 compatible glasses.

## 559 **Bibliography**

560 Adamo, D. E., Brice??o, E. M., Sindone, J. A., Alexander, N. B., and Moffat, S. D. (2012).  
561 Age differences in virtual environment and real world path integration. *Front. Aging*  
562 *Neurosci.* 4, 1–9. doi:10.3389/fnagi.2012.00026.

563 Allen, G. L., Kirasic, K. C., Dobson, S. H., Long, R. G., and Beck, S. (1996). Predicting  
564 environmental learning from spatial abilities: An indirect route. *Intelligence* 22, 327–  
565 355. doi:[https://doi.org/10.1016/S0160-2896\(96\)90026-4](https://doi.org/10.1016/S0160-2896(96)90026-4).

566 Allison, S. L., Fagan, A. M., Morris, J. C., and Head, D. (2016). Spatial Navigation in  
567 Preclinical Alzheimer’s Disease. *J. Alzheimers. Dis.* 52, 77–90. doi:10.3233/JAD-  
568 150855.

569 Antonova, E., Parslow, D., Brammer, M., Dawson, G. R., Jackson, S. H. D., and Morris, R.  
570 G. (2009). Age-related neural activity during allocentric spatial memory. *Memory* 17,  
571 125–143. doi:10.1080/09658210802077348.

572 Auger, S. D., and Maguire, E. A. (2018). Retrosplenial Cortex Indexes Stability beyond the  
573 Spatial Domain. *J. Neurosci.* 38, 1472–1481. doi:10.1523/JNEUROSCI.2602-17.2017.

574 Auger, S. D., Mullally, S. L., and Maguire, E. A. (2012). Retrosplenial cortex codes for  
575 permanent landmarks. *PLoS One* 7. doi:10.1371/journal.pone.0043620.

576 Auger, S. D., Zeidman, P., and Maguire, E. A. (2015). A central role for the retrosplenial

- 577 cortex in de novo environmental learning. *Elife* 4, 1–26. doi:10.7554/eLife.09031.
- 578 Bécu, M., Sheynikhovich, D., Tatur, G., Agathos, C. P., Bologna, L. L., Sahel, J.-A., et al.  
579 (2020). Age-related preference for geometric spatial cues during real-world navigation.  
580 *Nat. Hum. Behav.* 4, 88–99. doi:10.1038/s41562-019-0718-z.
- 581 Bo, J., Peltier, S. J., Noll, D. C., and Seidler, R. D. (2011). Age differences in symbolic  
582 representations of motor sequence learning. *Neurosci. Lett.* 504, 68–72.  
583 doi:10.1016/j.neulet.2011.08.060.
- 584 Bonner, M. F., and Epstein, R. A. (2017). Coding of navigational affordances in the human  
585 visual system. *Proc. Natl. Acad. Sci. U. S. A.* 114, 4793–4798.  
586 doi:10.1073/pnas.1618228114.
- 587 Brewer, A. a., and Barton, B. (2012). Effects of healthy aging on human primary visual  
588 cortex. *Health (Irvine, Calif.)*. 04, 695–702. doi:10.4236/health.2012.429109.
- 589 Burke, S. N., Gaynor, L. S., Barnes, C. A., Bauer, R. M., Bizon, J. L., Roberson, E. D., et al.  
590 (2018). Shared Functions of Perirhinal and Parahippocampal Cortices: Implications for  
591 Cognitive Aging. *Trends Neurosci.* 41, 349–359. doi:10.1016/J.TINS.2018.03.001.
- 592 Caffo, A. O., Lopez, A., Spano, G., Serino, S., Cipresso, P., Stasolla, F., et al. (2018). Spatial  
593 reorientation decline in aging: the combination of geometry and landmarks. *Aging Ment.*  
594 *Health* 22, 1372–1383. doi:10.1080/13607863.2017.1354973.
- 595 Cheng, K., and Newcombe, N. S. (2005). Is there a geometric module for spatial orientation?  
596 Squaring theory and evidence. *Psychon. Bull. Rev.* 12, 1–23. doi:10.3758/BF03196346.
- 597 Chersi, F., and Burgess, N. (2015). The Cognitive Architecture of Spatial Navigation:  
598 Hippocampal and Striatal Contributions. *Neuron* 88, 64–77.  
599 doi:10.1016/j.neuron.2015.09.021.
- 600 Chrastil, E. R. (2013). Neural evidence supports a novel framework for spatial navigation.  
601 *Psychon. Bull. Rev.* 20, 208–27. doi:10.3758/s13423-012-0351-6.
- 602 Ciaramelli, E., Rosenbaum, R. S., Solcz, S., Levine, B., and Moscovitch, M. (2010). Mental  
603 space travel: damage to posterior parietal cortex prevents egocentric navigation and  
604 reexperiencing of remote spatial memories. *J. Exp. Psychol. Learn. Mem. Cogn.* 36,  
605 619–634. doi:10.1037/a0019181.

- 606 Clancy Dollinger, S. M. (1995). Mental rotation performance: Age, sex, and visual field  
607 differences. *Dev. Neuropsychol.* 11, 215–222. doi:10.1080/87565649509540614.
- 608 Colombo, D., Serino, S., Tuena, C., Pedroli, E., Dakanalis, A., Cipresso, P., et al. (2017).  
609 Egocentric and allocentric spatial reference frames in aging: A systematic review.  
610 *Neurosci. Biobehav. Rev.* 80, 605–621. doi:10.1016/j.neubiorev.2017.07.012.
- 611 Cona, G., and Scarpazza, C. (2019). Where is the “where” in the brain? A meta-analysis of  
612 neuroimaging studies on spatial cognition. *Hum. Brain Mapp.* 40, 1867–1886.  
613 doi:10.1002/hbm.24496.
- 614 Corsi, P. M. (1973). Human memory and the medial temporal region of the brain. 34.
- 615 Coughlan, G., Laczó, J., Hort, J., Minihane, A.-M., and Hornberger, M. (2018). Spatial  
616 navigation deficits - overlooked cognitive marker for preclinical Alzheimer disease? *Nat.*  
617 *Rev. Neurol.* 14, 496–506. doi:10.1038/s41582-018-0031-x.
- 618 Dillen, K. N. H., Jacobs, H. I. L., Kukolja, J., von Reutern, B., Richter, N., Onur, Ö. A., et al.  
619 (2016). Aberrant functional connectivity differentiates retrosplenial cortex from posterior  
620 cingulate cortex in prodromal Alzheimer’s disease. *Neurobiol. Aging* 44, 114–126.  
621 doi:<https://doi.org/10.1016/j.neurobiolaging.2016.04.010>.
- 622 Ekstrom, A. D. (2015). Why vision is important to how we navigate. *Hippocampus* 25, 731–  
623 735. doi:10.1002/hipo.22449.
- 624 Epstein, R. A. (2008). Parahippocampal and retrosplenial contributions to human spatial  
625 navigation. *Trends Cogn. Sci.* 12, 388–396. doi:10.1016/j.tics.2008.07.004.
- 626 Epstein, R. A., Patai, E. Z., Julian, J. B., and Spiers, H. J. (2017). The cognitive map in  
627 humans: spatial navigation and beyond. *Nat. Neurosci.* 20, 1504–1513.  
628 doi:10.1038/nn.4656.
- 629 Epstein, R. a, and Vass, L. K. (2014). Neural systems for landmark-based wayfinding in  
630 humans. *Philos. Trans. R. Soc. Lond. B. Biol. Sci.* 369, 20120533.  
631 doi:10.1098/rstb.2012.0533.
- 632 Fjell, A. M., McEvoy, L., Holland, D., Dale, A. M., and Walhovd, K. B. (2014). What is  
633 normal in normal aging? Effects of aging, amyloid and Alzheimer’s disease on the  
634 cerebral cortex and the hippocampus. *Prog. Neurobiol.* 117, 20–40.

- 635           doi:10.1016/j.pneurobio.2014.02.004.
- 636   Folstein, M. F., Folstein, S. E., and McHugh, P. R. (1975). “Mini-mental state”. A practical  
637           method for grading the cognitive state of patients for the clinician. *J. Psychiatr. Res.* 12,  
638           189–198.
- 639   Foo, P., Warren, W. H., Duchon, A., and Tarr, M. J. (2005). Do humans integrate routes into a  
640           cognitive map? Map- versus landmark-based navigation of novel shortcuts. *J. Exp.*  
641           *Psychol. Learn. Mem. Cogn.* 31, 195–215. doi:10.1037/0278-7393.31.2.195.
- 642   Foster, T. C., Defazio, R. A., and Bizon, J. L. (2012). Characterizing cognitive aging of  
643           spatial and contextual memory in animal models. *Front. Aging Neurosci.* 4, 12.  
644           doi:10.3389/fnagi.2012.00012.
- 645   Friston, K. J., Holmes, A. P., Worsley, K. J., Poline, J. P., Frith, C. D., and Frackowiak, R. S.  
646           J. (1995). Statistical parametric maps in functional imaging: a general linear approach.  
647           *Hum. Brain Mapp.* 2, 189–210.
- 648   Gazova, I., Laczó, J., Rubinova, E., Mokrisova, I., Hyncicova, E., Andel, R., et al. (2013).  
649           Spatial navigation in young versus older adults. *Front. Aging Neurosci.* 5, 94.  
650           doi:10.3389/fnagi.2013.00094.
- 651   Gazova, I., Vlcek, K., Laczó, J., Nedelska, Z., Hyncicova, E., Mokrisova, I., et al. (2012).  
652           Spatial navigation—a unique window into physiological and pathological aging. *Front.*  
653           *Aging Neurosci.* 4, 16. doi:10.3389/fnagi.2012.00016.
- 654   Giocomo, L. M. (2016). Environmental boundaries as a mechanism for correcting and  
655           anchoring spatial maps. *J. Physiol.* 594, 6501–6511. doi:10.1113/JP270624.
- 656   Glasser, M. F., Sotiropoulos, S. N., Wilson, J. A., Coalson, T. S., Fischl, B., Andersson, J. L.,  
657           et al. (2013). The minimal preprocessing pipelines for the Human Connectome Project.  
658           *Neuroimage* 80, 105–124. doi:10.1016/j.neuroimage.2013.04.127.
- 659   Goodroe, S. C., Starnes, J., and Brown, T. I. (2018). The Complex Nature of Hippocampal-  
660           Striatal Interactions in Spatial Navigation. *Front. Hum. Neurosci.* 12, 250.  
661           doi:10.3389/fnhum.2018.00250.
- 662   Greene, N. R., and Naveh-Benjamin, M. (2020). A Specificity Principle of Memory: Evidence  
663           From Aging and Associative Memory. *Psychol. Sci.*, 0956797620901760.

- 664 doi:10.1177/0956797620901760.
- 665 Grön, G., Wunderlich, a P., Spitzer, M., Tomczak, R., and Riepe, M. W. (2000). Brain  
666 activation during human navigation: gender-different neural networks as substrate of  
667 performance. *Nat. Neurosci.* 3, 404–8. doi:10.1038/73980.
- 668 Harris, M. A., Wiener, J. M., and Wolbers, T. (2012). Aging specifically impairs switching to  
669 an allocentric navigational strategy. *Front. Aging Neurosci.* 4, 1–9.  
670 doi:10.3389/fnagi.2012.00029.
- 671 Harris, M. A., and Wolbers, T. (2012). Ageing effects on path integration and landmark  
672 navigation. *Hippocampus* 22, 1770–1780. doi:10.1002/hipo.22011.
- 673 Hartmeyer, S., Grzeschik, R., Wolbers, T., and Wiener, J. M. (2017). The Effects of  
674 Attentional Engagement on Route Learning Performance in a Virtual Environment: An  
675 Aging Study . *Front. Aging Neurosci.* 9, 235. Available at:  
676 <https://www.frontiersin.org/article/10.3389/fnagi.2017.00235>.
- 677 Herweg, N. A., and Kahana, M. J. (2018). Spatial Representations in the Human Brain. *Front.*  
678 *Hum. Neurosci.* 12, 297. doi:10.3389/fnhum.2018.00297.
- 679 Hirsch, P., Schwarzkopp, T., Declerck, M., Reese, S., and Koch, I. (2016). Age-related  
680 differences in task switching and task preparation: Exploring the role of task-set  
681 competition. *Acta Psychol. (Amst)*. doi:10.1016/j.actpsy.2016.06.008.
- 682 Iachini, T., Poderico, C., Ruggiero, G., and Iavarone, A. (2005). Age differences in mental  
683 scanning of locomotor maps. *Disabil. Rehabil.* 27, 741–752.  
684 doi:10.1080/09638280400014782.
- 685 Iaria, G., Palermo, L., Committeri, G., and Barton, J. J. S. (2009). Age differences in the  
686 formation and use of cognitive maps. *Behav. Brain Res.* 196, 187–191.  
687 doi:10.1016/j.bbr.2008.08.040.
- 688 Iaria, G., Petrides, M., Dagher, A., Pike, B., and Bohbot, V. D. (2003). Cognitive strategies  
689 dependent on the hippocampus and caudate nucleus in human navigation: variability and  
690 change with practice. *J. Neurosci.* 23, 5945–5952. doi:23/13/5945 [pii].
- 691 Igloi, K., Doeller, C. F., Berthoz, A., Rondi-Reig, L., and Burgess, N. (2010). Lateralized  
692 human hippocampal activity predicts navigation based on sequence or place memory.

- 693 *Proc. Natl. Acad. Sci. U. S. A.* 107, 14466–14471. doi:10.1073/pnas.1004243107/-  
694 /DCSupplemental.www.pnas.org/cgi/doi/10.1073/pnas.1004243107.
- 695 Igloi, K., Doeller, C. F., Paradis, A.-L., Benchenane, K., Berthoz, A., Burgess, N., et al.  
696 (2015). Interaction Between Hippocampus and Cerebellum Crus I in Sequence-Based but  
697 not Place-Based Navigation. *Cereb. Cortex* 25, 4146–4154. doi:10.1093/cercor/bhu132.
- 698 Igloi, K., Doeller, C. F., Paradis, A.-L., Benchenane, K., Berthoz, A., Burgess, N., et al.  
699 (2014). Interaction Between Hippocampus and Cerebellum Crus I in Sequence-Based but  
700 not Place-Based Navigation. *Cereb. Cortex*, bhu132-. doi:10.1093/cercor/bhu132.
- 701 Ito, H. T. (2018). Prefrontal-hippocampal interactions for spatial navigation. *Neurosci. Res.*  
702 129, 2–7. doi:10.1016/j.neures.2017.04.016.
- 703 Janzen, G., and van Turenout, M. (2004). Selective neural representation of objects relevant  
704 for navigation. *Nat. Neurosci.* 7, 673–677. doi:10.1038/nn1257.
- 705 Javadi, A.-H., Emo, B., Howard, L. R., Zisch, F. E., Yu, Y., Knight, R., et al. (2017).  
706 Hippocampal and prefrontal processing of network topology to simulate the future. *Nat.*  
707 *Commun.* 8, 14652. doi:10.1038/ncomms14652.
- 708 Julian, J. B., Keinath, A. T., Marchette, S. A., and Epstein, R. A. (2018). The Neurocognitive  
709 Basis of Spatial Reorientation. *Curr. Biol.* 28, R1059–R1073.  
710 doi:10.1016/j.cub.2018.04.057.
- 711 Julian, J. B., Ryan, J., Hamilton, R. H., Epstein, R. A., Julian, J. B., Ryan, J., et al. (2016).  
712 The Occipital Place Area Is Causally Involved in Representing Environmental  
713 Boundaries during Navigation. *Curr. Biol.*, 1–6. doi:10.1016/j.cub.2016.02.066.
- 714 Kamps, F. S., Julian, J. B., Kubilius, J., Kanwisher, N., and Dilks, D. D. (2016). The occipital  
715 place area represents the local elements of scenes. *Neuroimage* 132, 417–424.  
716 doi:10.1016/j.neuroimage.2016.02.062.
- 717 Kauffmann, L., Ramanoël, S., and Peyrin, C. (2014). The neural bases of spatial frequency  
718 processing during scene perception. *Front. Integr. Neurosci.* 8.  
719 doi:10.3389/fnint.2014.00037.
- 720 Kimura, K., Reichert, J. F., Kelly, D. M., and Moussavi, Z. (2019). Older Adults Show Less  
721 Flexible Spatial Cue Use When Navigating in a Virtual Reality Environment Compared



- 722 With Younger Adults. *Neurosci. Insights* 14, 2633105519896803.  
723 doi:10.1177/2633105519896803.
- 724 Kirasic, K. C. (1991). Spatial cognition and behavior in young and elderly adults: implications  
725 for learning new environments. *Psychol. Aging* 6, 10–18. doi:10.1037//0882-  
726 7974.6.1.10.
- 727 Konishi, K., Etchamendy, N., Roy, S., Marighetto, A., Rajah, N., and Bohbot, V. D. (2013).  
728 Decreased functional magnetic resonance imaging activity in the hippocampus in favor  
729 of the caudate nucleus in older adults tested in a virtual navigation task. *Hippocampus*  
730 23, 1005–1014. doi:10.1002/hipo.22181.
- 731 Kozhevnikov, M., and Hegarty, M. (2001). A dissociation between object manipulation  
732 spatial ability and spatial orientation ability. *Mem. Cognit.* 29, 745–756.  
733 doi:10.3758/bf03200477.
- 734 Kozhevnikov, M., Motes, M. A., Rasch, B., and Blajenkova, O. (2006). Perspective-taking vs.  
735 mental rotation transformations and how they predict spatial navigation performance.  
736 *Appl. Cogn. Psychol.* 20, 397–417. doi:10.1002/acp.1192.
- 737 Kravitz, D. J., Saleem, K. S., Baker, C. I., Ungerleider, L. G., and Mishkin, M. (2013). The  
738 ventral visual pathway: an expanded neural framework for the processing of object  
739 quality. *Trends Cogn. Sci.* 17, 26–49. doi:https://doi.org/10.1016/j.tics.2012.10.011.
- 740 Kuhn, S., and Gallinat, J. (2014). Segregating cognitive functions within hippocampal  
741 formation: a quantitative meta-analysis on spatial navigation and episodic memory. *Hum.*  
742 *Brain Mapp.* 35, 1129–1142. doi:10.1002/hbm.22239.
- 743 Laczo, J., Andel, R., Nedelska, Z., Vyhnaek, M., Vlcek, K., Crutch, S., et al. (2017).  
744 Exploring the contribution of spatial navigation to cognitive functioning in older adults.  
745 *Neurobiol. Aging* 51, 67–70. doi:10.1016/j.neurobiolaging.2016.12.003.
- 746 Laczo, J., Parizkova, M., and Moffat, S. D. (2018). Spatial navigation, aging and Alzheimer’s  
747 disease. *Aging (Albany, NY)*. 10, 3050–3051. doi:10.18632/aging.101634.
- 748 Lester, A. W., Moffat, S. D., Wiener, J. M., Barnes, C. A., and Wolbers, T. (2017). The Aging  
749 Navigational System. *Neuron* 95, 1019–1035. doi:10.1016/j.neuron.2017.06.037.
- 750 Li, A. W. Y., and King, J. (2019). Spatial memory and navigation in ageing: A systematic

- 751 review of MRI and fMRI studies in healthy participants. *Neurosci. Biobehav. Rev.* 103,  
752 33–49. doi:10.1016/j.neubiorev.2019.05.005.
- 753 Lithfous, S., Dufour, A., and Despres, O. (2013). Spatial navigation in normal aging and the  
754 prodromal stage of Alzheimer’s disease: insights from imaging and behavioral studies.  
755 *Ageing Res. Rev.* 12, 201–213. doi:10.1016/j.arr.2012.04.007.
- 756 Litman, L., Awipi, T., and Davachi, L. (2009). Category-specificity in the human medial  
757 temporal lobe cortex. *Hippocampus* 19, 308–319. doi:10.1002/hipo.20515.
- 758 Marchette, S. a, Vass, L. K., Ryan, J., and Epstein, R. a (2015). Outside Looking In:  
759 Landmark Generalization in the Human Navigational System. *J. Neurosci.* 35, 14896–  
760 908. doi:10.1523/JNEUROSCI.2270-15.2015.
- 761 Mazaika, P.; Hoefl, F.; Glover, GH.; Reiss, A. . (2009). Methods and Software for fMRI  
762 analysis for Clinical Subjects. in *Organization for Human Brain Mapping* (San  
763 Francisco, CA, USA).
- 764 Meneghetti, C., Muffato, V., Borella, E., and De Beni, R. (2018). Map Learning in Normal  
765 Aging: The Role of Individual Visuo-Spatial Abilities and Implications. *Curr.*  
766 *Alzheimer Res.* 15, 205–218. doi:10.2174/1567205014666171030113515.
- 767 Merhav, M., Riemer, M., and Wolbers, T. (2019). Spatial updating deficits in human aging  
768 are associated with traces of former memory representations. *Neurobiol. Aging* 76, 53–  
769 61. doi:10.1016/j.neurobiolaging.2018.12.010.
- 770 Merhav, M., and Wolbers, T. (2019). Aging and spatial cues influence the updating of  
771 navigational memories. *Sci. Rep.* 9, 11469. doi:10.1038/s41598-019-47971-2.
- 772 Meulenbroek, O., Petersson, K. M., Voermans, N., Weber, B., and Fernandez, G. (2004). Age  
773 differences in neural correlates of route encoding and route recognition. *Neuroimage* 22,  
774 1503–1514. doi:10.1016/j.neuroimage.2004.04.007.
- 775 Miniaci, M. C., and De Leonibus, E. (2018). Missing the egocentric spatial reference: a blank  
776 on the map. *F1000Research* 7, 168. doi:10.12688/f1000research.13675.1.
- 777 Mitchell, A. S., Czajkowski, R., Zhang, N., Jeffery, K., and Nelson, A. J. D. (2018).  
778 Retrosplenial cortex and its role in spatial cognition. *Brain Neurosci. Adv.* 2,  
779 2398212818757098. doi:10.1177/2398212818757098.

- 780 Moffat, S. D. (2009). Aging and spatial navigation: What do we know and where do we go?  
781 *Neuropsychol. Rev.* 19, 478–489. doi:10.1007/s11065-009-9120-3.
- 782 Moffat, S. D., Elkins, W., and Resnick, S. M. (2006). Age differences in the neural systems  
783 supporting human allocentric spatial navigation. *Neurobiol. Aging* 27, 965–972.  
784 doi:10.1016/j.neurobiolaging.2005.05.011.
- 785 Moffat, S. D., and Resnick, S. M. (2002). Effects of age on virtual environment place  
786 navigation and allocentric cognitive mapping. *Behav. Neurosci.* 116, 851–859.  
787 doi:10.1037/0735-7044.116.5.851.
- 788 Muffato, V., Meneghetti, C., and De Beni, R. (2020). The role of visuo-spatial abilities in  
789 environment learning from maps and navigation over the adult lifespan. *Br. J. Psychol.*  
790 111, 70–91. doi:10.1111/bjop.12384.
- 791 Nau, M., Julian, J. B., and Doeller, C. F. (2018). How the Brain’s Navigation System Shapes  
792 Our Visual Experience. *Trends Cogn. Sci.* 22, 810–825. doi:10.1016/j.tics.2018.06.008.
- 793 Ohta, R. J., Walsh, D. A., and Krauss, I. K. (1981). Spatial perspective-taking ability in young  
794 and elderly adults. *Exp. Aging Res.* 7, 45–63. doi:10.1080/03610738108259785.
- 795 Packard, M. G., and Goodman, J. (2013). Factors that influence the relative use of multiple  
796 memory systems. *Hippocampus* 23, 1044–1052. doi:10.1002/hipo.22178.
- 797 Perrochon, A., Mandigout, S., Petruzzellis, S., Soria Garcia, N., Zaoui, M., Berthoz, A., et al.  
798 (2018). The influence of age in women in visuo-spatial memory in reaching and  
799 navigation tasks with and without landmarks. *Neurosci. Lett.* 684, 13–17.  
800 doi:10.1016/j.neulet.2018.06.054.
- 801 Persichetti, A. S., and Dilks, D. D. (2016). Perceived egocentric distance sensitivity and  
802 invariance across scene-selective cortex. *Cortex.* 77, 155–163.  
803 doi:10.1016/j.cortex.2016.02.006.
- 804 Persichetti, A. S., and Dilks, D. D. (2018). Dissociable Neural Systems for Recognizing  
805 Places and Navigating through Them. *J. Neurosci.* 38, 10295 LP – 10304.  
806 doi:10.1523/JNEUROSCI.1200-18.2018.
- 807 Persichetti, A. S., and Dilks, D. D. (2019). Distinct representations of spatial and categorical  
808 relationships across human scene-selective cortex. *Proc. Natl. Acad. Sci.* 116, 21312 LP

- 809 – 21317. doi:10.1073/pnas.1903057116.
- 810 Picucci, L., Caffò, A. O., and Bosco, A. (2009). Age and sex differences in a virtual version  
811 of the reorientation task. *Cogn. Process.* doi:10.1007/s10339-009-0321-8.
- 812 Ramanoël, S., Kauffmann, L., Cousin, E., Dojat, M., and Peyrin, C. (2015). Age-related  
813 differences in spatial frequency processing during scene categorization. *PLoS One.*  
814 doi:10.1371/journal.pone.0134554.
- 815 Ramanoël, S., York, E., Le Petit, M., Lagrene, K., Habas, C., and Arleo, A. (2019). Age-  
816 Related Differences in Functional and Structural Connectivity in the Spatial Navigation  
817 Brain Network. *Front. Neural Circuits* 13, 69. doi:10.3389/fncir.2019.00069.
- 818 Ratliff, K. R., and Newcombe, N. S. (2008). Reorienting when cues conflict: Evidence for an  
819 adaptive-combination view. *Psychol. Sci.* doi:10.1111/j.1467-9280.2008.02239.x.
- 820 Rochefort, C., Lefort, J. M., and Rondi-Reig, L. (2013). The cerebellum: a new key structure  
821 in the navigation system. *Front. Neural Circuits* 7, 35. doi:10.3389/fncir.2013.00035.
- 822 Rodgers, M. K., Sindone, J. A., and Moffat, S. D. (2012). Effects of age on navigation  
823 strategy. *Neurobiol. Aging* 33, 202.e15-202.e22.  
824 doi:10.1016/j.neurobiolaging.2010.07.021.
- 825 Sack, A. T. (2009). Parietal cortex and spatial cognition. *Behav. Brain Res.* 202, 153–161.  
826 doi:<https://doi.org/10.1016/j.bbr.2009.03.012>.
- 827 Schuck, N. W., Doeller, C. F., Polk, T. A., Lindenberger, U., and Li, S.-C. (2015a). Human  
828 aging alters the neural computation and representation of space. *Neuroimage* I, 141–150.  
829 doi:10.1016/j.neuroimage.2015.05.031.
- 830 Schuck, N. W., Doeller, C. F., Polk, T. A., Lindenberger, U., and Li, S. C. (2015b). Human  
831 aging alters the neural computation and representation of space. *Neuroimage.*  
832 doi:10.1016/j.neuroimage.2015.05.031.
- 833 Seghier, M. L. (2012). The Angular Gyrus. *Neurosci.* 19, 43–61.  
834 doi:10.1177/1073858412440596.
- 835 Sherrill, K. R., Chrastil, E. R., Ross, R. S., Erdem, U. M., Hasselmo, M. E., and Stern, C. E.  
836 (2015). Functional connections between optic flow areas and navigationally responsive

- 837 brain regions during goal-directed navigation. *Neuroimage* 118, 386–396.  
838 doi:10.1016/j.neuroimage.2015.06.009.
- 839 Spiers, H. J., and Barry, C. (2015a). Neural systems supporting navigation. *Curr. Opin.*  
840 *Behav. Sci.* 1, 47–55. doi:10.1016/j.cobeha.2014.08.005.
- 841 Spiers, H. J., and Barry, C. (2015b). Neural systems supporting navigation. *Curr. Opin.*  
842 *Behav. Sci.* 1, 47–55. doi:https://doi.org/10.1016/j.cobeha.2014.08.005.
- 843 Stankiewicz, B. J., and Kalia, A. A. (2007). Acquisition of Structural Versus Object  
844 Landmark Knowledge. *J. Exp. Psychol. Hum. Percept. Perform.* doi:10.1037/0096-  
845 1523.33.2.378.
- 846 Sturz, B. R., Kilday, Z. A., and Bodily, K. D. (2013). Does constraining field of view prevent  
847 extraction of geometric cues for humans during virtual-environment reorientation? *J.*  
848 *Exp. Psychol. Anim. Behav. Process.* 39, 390–396. doi:10.1037/a0032543.
- 849 Sutton, J. E., Joannisse, M. F., and Newcombe, N. S. (2010). Spinning in the scanner: Neural  
850 correlates of virtual reorientation. *J. Exp. Psychol. Learn. Mem. Cogn.* 36, 1097–1107.  
851 doi:10.1037/a0019938.
- 852 Techentin, C., Voyer, D., and Voyer, S. D. (2014). Spatial Abilities and Aging: A Meta-  
853 Analysis. *Exp. Aging Res.* 40, 395–425. doi:10.1080/0361073X.2014.926773.
- 854 Tommasi, L., Chiandetti, C., Pecchia, T., Sovrano, V. A., and Vallortigara, G. (2012). From  
855 natural geometry to spatial cognition. *Neurosci. Biobehav. Rev.* 36, 799–824.  
856 doi:10.1016/j.neubiorev.2011.12.007.
- 857 United Nations, Department of Economic and Social Affairs, Population Division (2019).  
858 World population ageing. Highlight (ST/ESA/SER.A/430).
- 859 van der Ham, I. J. M., Baalbergen, H., van der Heijden, P. G. M., Postma, A., Braspenning,  
860 M., and van der Kuil, M. N. A. (2015). Distance comparisons in virtual reality: effects of  
861 path, context, and age. *Front. Psychol.* 6, 1103. doi:10.3389/fpsyg.2015.01103.
- 862 van der Ham, I. J. M., and Claessen, M. H. G. (2020). How age relates to spatial navigation  
863 performance: Functional and methodological considerations. *Ageing Res. Rev.* 58,  
864 101020. doi:https://doi.org/10.1016/j.arr.2020.101020.

- 865 Vandenberg, S. G., and Kuse, A. R. (1978). Mental rotations, a group test of three-  
866 dimensional spatial visualization. *Percept. Mot. Skills* 47, 599–604.  
867 doi:10.2466/pms.1978.47.2.599.
- 868 Vann, S. D., Aggleton, J. P., and Maguire, E. A. (2009). What does the retrosplenial cortex  
869 do? *Nat. Rev. Neurosci.* 10, 792–802. doi:10.1038/nrn2733.
- 870 Wandell, B. A., Brewer, A. A., and Dougherty, R. F. (2005). Visual field map clusters in  
871 human cortex. *Philos. Trans. R. Soc. Lond. B. Biol. Sci.* 360, 693–707.  
872 doi:10.1098/rstb.2005.1628.
- 873 Weiskopf, N., Hutton, C., Josephs, O., and Deichmann, R. (2006). Optimal EPI parameters  
874 for reduction of susceptibility-induced BOLD sensitivity losses: A whole-brain analysis  
875 at 3 T and 1.5 T. *Neuroimage*. doi:10.1016/j.neuroimage.2006.07.029.
- 876 Wiener, J. M., de Condappa, O., Harris, M. A., and Wolbers, T. (2013). Maladaptive Bias for  
877 Extrahippocampal Navigation Strategies in Aging Humans. *J. Neurosci.*  
878 doi:10.1523/jneurosci.0717-12.2013.
- 879 Wiener, J. M., Kmecova, H., and de Condappa, O. (2012). Route repetition and route  
880 retracing: Effects of cognitive aging. *Front. Aging Neurosci.* 4, 1–7.  
881 doi:10.3389/fnagi.2012.00007.
- 882 Wilkniss, S. M., Jones, M. G., Korol, D. L., Gold, P. E., and Manning, C. A. (1997). Age-  
883 related differences in an ecologically based study of route learning. *Psychol. Aging* 12,  
884 372–375. doi:10.1037/0882-7974.12.2.372.
- 885 Wolbers, T., and Büchel, C. (2005). Dissociable Retrosplenial and Hippocampal  
886 Contributions to Successful Formation of Survey Representations. *J. Neurosci.* 25,  
887 3333–3340. doi:10.1523/JNEUROSCI.4705-04.2005.
- 888 Wolbers, T., and Hegarty, M. (2010). What determines our navigational abilities? *Trends*  
889 *Cogn. Sci.* 14, 138–146. doi:10.1016/j.tics.2010.01.001.
- 890 Zajac, L., Burte, H., Taylor, H. A., and Killiany, R. (2019). Self-reported navigation ability is  
891 associated with optic flow-sensitive regions' functional connectivity patterns during  
892 visual path integration. *Brain Behav.* 9, e01236. doi:10.1002/brb3.1236.
- 893 Zhong, J. Y., and Moffat, S. D. (2016). Age-Related Differences in Associative Learning of

894 Landmarks and Heading Directions in a Virtual Navigation Task. *Front. Aging Neurosci.*  
895 8, 122. doi:10.3389/fnagi.2016.00122.

896 Zhong, J. Y., and Moffat, S. D. (2018). Extrahippocampal Contributions to Age-Related  
897 Changes in Spatial Navigation Ability. *Front. Hum. Neurosci.* 12, 272.  
898 doi:10.3389/fnhum.2018.00272.

899

| Sex (M/F)                                          | Groups            |                   | p-value   |
|----------------------------------------------------|-------------------|-------------------|-----------|
|                                                    | Young adults      | Older adults      |           |
|                                                    | 18/7              | 7/10              |           |
|                                                    | Mean ( $\pm$ SEM) | Mean ( $\pm$ SEM) |           |
| Age <sup>1</sup>                                   | 25.4 ( $\pm$ 0.5) | 73.0 ( $\pm$ 0.9) | p < 0.001 |
| Total brain volume <sup>1</sup> (cm <sup>3</sup> ) | 1301 ( $\pm$ 18)  | 1061 ( $\pm$ 23)  | p < 0.001 |
| MMSE <sup>2</sup>                                  | 30.0 ( $\pm$ 0.0) | 28.8 ( $\pm$ 0.4) | p < 0.001 |
| 3D mental rotation <sup>1</sup>                    | 18.3 ( $\pm$ 0.9) | 12.7 ( $\pm$ 1.2) | p < 0.001 |
| Corsi forward <sup>2</sup>                         | 7.2 ( $\pm$ 0.2)  | 4.4 ( $\pm$ 0.2)  | p < 0.001 |
| Corsi backward <sup>2</sup>                        | 6.2 ( $\pm$ 0.3)  | 4.6 ( $\pm$ 0.2)  | p < 0.001 |
| Perspective taking test <sup>2</sup>               | 15.3 ( $\pm$ 1.7) | 46.1 ( $\pm$ 6.7) | p < 0.001 |

900

901 **Table 1.** Descriptive characteristics and cognitive performance of young and older  
 902 participants. M: male; F: female; SEM: standard error of the mean; MMSE: mini mental state  
 903 examination; <sup>1</sup>Independent samples t-test; <sup>2</sup>Mann Whitney U test.

904



|                                        |                                      | H  | BA | k   | x   | y   | z    | t    |
|----------------------------------------|--------------------------------------|----|----|-----|-----|-----|------|------|
| Multiple Regression                    |                                      |    |    |     |     |     |      |      |
| Navigation time / [Landmark > Control] |                                      |    |    |     |     |     |      |      |
| <b>All participants</b>                | Inferior Temporal Gyrus              | R  | 21 | 40  | 45  | -22 | -16  | 5.17 |
|                                        |                                      |    |    |     | 51  | -28 | -7   | 4.56 |
|                                        | Middle Frontal Gyrus                 | R  | 9  | 35  | 18  | 44  | 26   | 4.91 |
|                                        | Middle Temporal Gyrus                | R  | 20 | 16  | 45  | 8   | -37  | 4.84 |
|                                        |                                      |    |    |     | 54  | 5   | -34  | 4.04 |
|                                        | Lingual Gyrus                        | R  | -  | 15  | 30  | -49 | 2    | 4.66 |
|                                        | [Middle Temporal Gyrus]              |    |    |     | 42  | -49 | 5    | 3.65 |
|                                        | Lingual Gyrus                        | L  | -  | 22  | -24 | -46 | 5    | 4.58 |
|                                        | Angular Gyrus                        | L  | 39 | 76  | -57 | -58 | 29   | 4.54 |
|                                        |                                      |    |    |     | -54 | -70 | 26   | 4.41 |
|                                        |                                      |    |    |     | -45 | -79 | 35   | 3.99 |
|                                        | Cerebellum Lobule VI                 | R  | -  | 10  | 15  | -67 | -28  | 4.48 |
|                                        |                                      |    | 15 | 27  | -55 | -31 | 4.38 |      |
| Superior Occipital Gyrus               | L                                    | 18 | 14 | -21 | -97 | 23  | 4.41 |      |
| Cerebellum Vermis                      |                                      |    | 58 | 0   | -55 | -4  | 4.35 |      |
|                                        |                                      |    |    | 0   | -40 | -13 | 3.91 |      |
| Parahippocampal Gyrus                  | L                                    | -  | 19 | -36 | -43 | -4  | 4.17 |      |
|                                        |                                      |    |    | -36 | -34 | -10 | 3.61 |      |
| Superior Frontal Gyrus                 | R                                    | 10 | 20 | 9   | 62  | 23  | 4.03 |      |
|                                        |                                      |    |    | 6   | 68  | 14  | 3.60 |      |
| <b>Young adults</b>                    | Superior Frontal Gyrus               | L  |    | 13  | -15 | 11  | 44   | 4.52 |
|                                        | Precentral Gyrus                     | R  |    | 11  | 9   | -22 | 77   | 4.16 |
| <b>Older adults</b>                    | Angular Gyrus                        | L  |    | 20  | -60 | -55 | 29   | 5.84 |
|                                        | Brainstem /<br>Parahippocampal Gyrus | L  |    | 12  | -3  | -34 | -7   | 4.90 |

905

906 **Table 2.** Cerebral regions whose activity for the contrast [Landmark > Control] was predicted  
907 by navigation time across all participants and across age groups (sex and intracranial volume  
908 were included as covariates). The statistical threshold was defined as  $p < 0.001$  uncorrected  
909 for multiple comparisons at voxel-level with an extent voxel threshold set at 10 voxels. For  
910 each cluster, the region with the maximum t-value is listed first and other regions in the  
911 cluster are listed underneath [in square brackets]. Montreal Neurological Institute (MNI)  
912 coordinates (x, y, z) of the peak activation and number of voxels (k) in a cluster are also  
913 shown. H = hemisphere; R = right hemisphere; L = left hemisphere; BA = Brodmann area.

|                         |                                                     | H | BA    | k  | x   | y   | z   | t    |
|-------------------------|-----------------------------------------------------|---|-------|----|-----|-----|-----|------|
| Group Analyses          |                                                     |   |       |    |     |     |     |      |
| [Landmark > Control]    |                                                     |   |       |    |     |     |     |      |
| <b>Within group</b>     |                                                     |   |       |    |     |     |     |      |
| <b>[Young]</b>          | Inferior Occipital Gyrus                            | R | 18    | 65 | 30  | -88 | -10 | 5.07 |
|                         | Superior Temporal Gyrus                             | L | 38    | 21 | -48 | 20  | -25 | 4.54 |
|                         |                                                     |   |       |    | -42 | 11  | -22 | 4.01 |
|                         | Cerebellum Crus I-II                                | R | -     | 19 | 33  | -82 | -34 | 4.49 |
|                         | Middle Occipital Gyrus                              | L | 18    | 37 | -30 | -97 | -7  | 4.42 |
|                         | [Inferior Occipital Gyrus]                          | L | 19    |    | -39 | -85 | -13 | 3.54 |
|                         | Inferior Temporal Gyrus<br>(Amygdala / Hippocampus) | L | 53/54 | 15 | -30 | -1  | -22 | 4.37 |
|                         | Middle Occipital Gyrus                              | R | 19    | 16 | 48  | -79 | 2   | 4.20 |
| <b>[Old]</b>            | <i>No significant activation</i>                    |   |       |    |     |     |     |      |
| <b>Between group</b>    |                                                     |   |       |    |     |     |     |      |
| <b>[Young &gt; Old]</b> | Inferior Temporal Gyrus<br>(Amygdala / Hippocampus) | L | -     | 12 | -33 | 2   | -25 | 3.86 |
|                         |                                                     |   |       |    | -36 | -7  | -25 | 3.82 |
| <b>[Old &gt; Young]</b> | <i>No significant activation</i>                    |   |       |    |     |     |     |      |

914

915 **Table 3.** Cerebral regions whose activity for the contrast [Landmark > Control] was elicited  
916 by within-group or between-group analyses (total intracranial volume was included as a  
917 covariate). The statistical threshold was defined as  $p < 0.001$  uncorrected for multiple  
918 comparisons at voxel-level with an extent voxel threshold set at 10 voxels. For each cluster,  
919 the region with the maximum t-value is listed first and other regions in the cluster are listed  
920 underneath [in square brackets]. Montreal Neurological Institute (MNI) coordinates (x, y, z)  
921 of the peak activation and number of voxels (k) in a cluster are also shown. H = hemisphere;  
922 R = right hemisphere; L = left hemisphere; BA = Brodmann area.

923

924

|                |                                  | H | BA | k  | x   | y   | z   | t    |
|----------------|----------------------------------|---|----|----|-----|-----|-----|------|
| Group Analyses |                                  |   |    |    |     |     |     |      |
| [CTRL > Fix]   |                                  |   |    |    |     |     |     |      |
| [Young > Old]  | <i>No significant activation</i> |   |    |    |     |     |     |      |
| [Old > Young]  | Middle Frontal Gyrus             | L | 8  | 80 | -27 | 32  | 56  | 5.56 |
|                | [Middle Frontal Gyrus]           |   |    |    | -36 | 23  | 56  | 4.58 |
|                | [Superior Frontal Gyrus]         |   | 6  |    | -18 | 32  | 62  | 4.05 |
|                | Superior Temporal Gyrus          | R | -  | 18 | 36  | 17  | -19 | 4.71 |
|                | Superior Frontal Gyrus           | R | 10 | 32 | 12  | 56  | -10 | 4.56 |
|                | [Middle Frontal Gyrus]           |   |    |    | 15  | 44  | -4  | 4.02 |
|                | Inferior Temporal Gyrus          | L | 37 | 25 | -54 | -49 | -13 | 4.39 |
|                | Supramarginal Gyrus              | R | 40 | 31 | 42  | -40 | 41  | 4.23 |
|                | [Superior Parietal Gyrus]        |   | 7  |    | 33  | -46 | 38  | 4.21 |
|                | Superior Frontal Gyrus           | L | 32 | 14 | -12 | 41  | 2   | 4.16 |
|                | [Middle Frontal Gyrus]           |   |    |    | -18 | 41  | -4  | 4.10 |
|                | Inferior Frontal Gyrus           | L | 46 | 38 | -36 | 35  | 14  | 4.15 |
|                |                                  |   |    |    | -48 | 41  | 11  | 3.85 |
|                | Precuneus                        | R | 31 | 12 | 9   | -58 | 38  | 4.00 |
|                | Middle Frontal Gyrus             | L | 8  | 20 | -51 | 20  | 41  | 3.92 |
|                |                                  |   |    |    | -48 | 11  | 50  | 3.81 |
|                | Inferior Frontal Gyrus           | L | 45 | 12 | -57 | 23  | 8   | 3.79 |

925

926 **Table 4.** Cerebral regions whose activity for the contrast [Control > Fixation] was elicited by  
 927 between-group analyses (total intracranial volume was included as covariate). The statistical  
 928 threshold was defined as  $p < 0.001$  uncorrected for multiple comparisons at voxel-level with  
 929 an extent voxel threshold set at 10 voxels. For each cluster, the region with the maximum t-  
 930 value is listed first and other regions in the cluster are listed underneath [in square brackets].  
 931 Montreal Neurological Institute (MNI) coordinates (x, y, z) of the peak and number of voxels  
 932 (k) of clusters are also shown. CTRL = Control condition; Fix = Fixation; H = hemisphere; R  
 933 = right hemisphere; L = left hemisphere; BA = Brodmann area.

934

935

|                |                                  | H | BA | k   | x   | y   | z   | t    |
|----------------|----------------------------------|---|----|-----|-----|-----|-----|------|
| Group Analyses |                                  |   |    |     |     |     |     |      |
| [LMK > Fix]    |                                  |   |    |     |     |     |     |      |
| [Young > Old]  | <i>No significant activation</i> |   |    |     |     |     |     |      |
| [Old > Young]  | Middle Frontal Gyrus             | R |    | 22  | 24  | 47  | -1  | 6.06 |
|                | Angular Gyrus                    | L |    | 223 | -30 | -64 | 47  | 5.66 |
|                | [Superior Parietal Gyrus]        |   |    |     | -33 | -55 | 44  | 5.59 |
|                | [Supramarginal Gyrus]            |   |    |     | -48 | -43 | 44  | 5.32 |
|                | Middle Frontal Gyrus             | R |    | 34  | 39  | 38  | 17  | 5.37 |
|                |                                  |   |    |     | 33  | 47  | 20  | 4.47 |
|                | Cerebellum                       | R | -  | 23  | 36  | -73 | -22 | 5.19 |
|                | Middle Frontal Gyrus             | L |    | 127 | -42 | 5   | 41  | 5.14 |
|                |                                  |   |    |     | -45 | 26  | 26  | 5.13 |
|                |                                  |   |    |     | -45 | 5   | 50  | 5.12 |
|                | Superior Parietal Gyrus          | R |    | 36  | 30  | -55 | 44  | 4.89 |
|                | [Angular Gyrus]                  |   |    |     | 30  | -64 | 53  | 4.64 |

936 **Table 5.** Cerebral regions whose activity for the contrast [Landmark > Fixation] was elicited  
937 by between-group analyses (total intracranial volume was included as covariate). The  
938 statistical threshold for cluster was defined as  $p < 0.05$  FWE-corrected for multiple  
939 comparisons with an extent voxel threshold set at 10 voxels. For each cluster, the region with  
940 the maximum t-value is listed first and other regions in the cluster are listed underneath [in  
941 square brackets]. Montreal Neurological Institute (MNI) coordinates (x, y, z) of the peak and  
942 number of voxels (k) of clusters are also shown. LMK = Landmark condition; Fix: Fixation  
943 condition; H = hemisphere; R = right hemisphere; L = left hemisphere; BA = Brodmann area;  
944 FWE = family-wise error.  
945

(A) Landmark condition

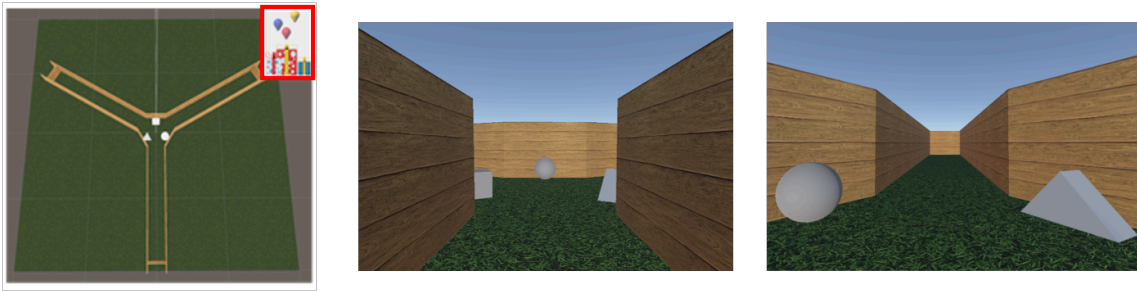

(B) Control condition

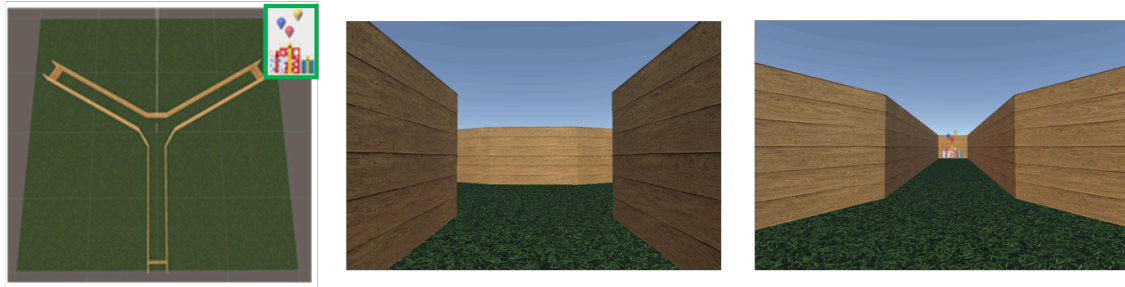

946

947 **Figure 1.** The virtual environment. (A) An overhead perspective of the environment for the  
948 landmark condition and two example views representing a first-person perspective within the  
949 maze. (B) An overhead perspective of the environment for the control condition and example  
950 views within the maze. Red: hidden goal; Green: visible goal. The aerial view was never seen  
951 by participants.

952

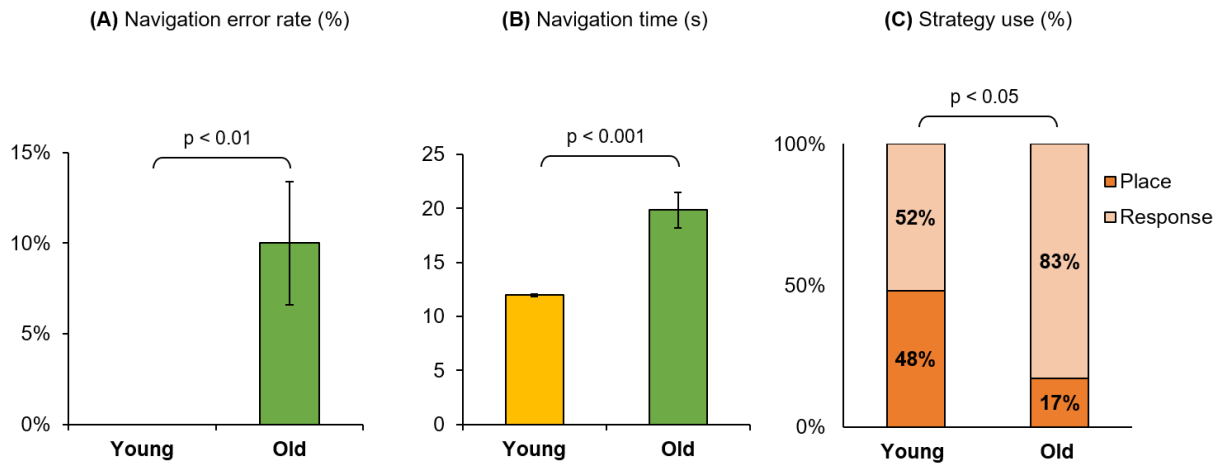

953

954 **Figure 2.** Behavioral results for the virtual navigation task across age groups. **(A)** Proportion  
955 of trials in which the wrong corridor was chosen (navigation error rate). **(B)** Time taken to  
956 reach the goal averaged across 7 trials in the landmark condition (navigation time). **(C)**  
957 Proportion of participants who used a place-based or response-based strategy in the landmark  
958 condition (strategy use). Error bars represent the standard errors of the mean.

959

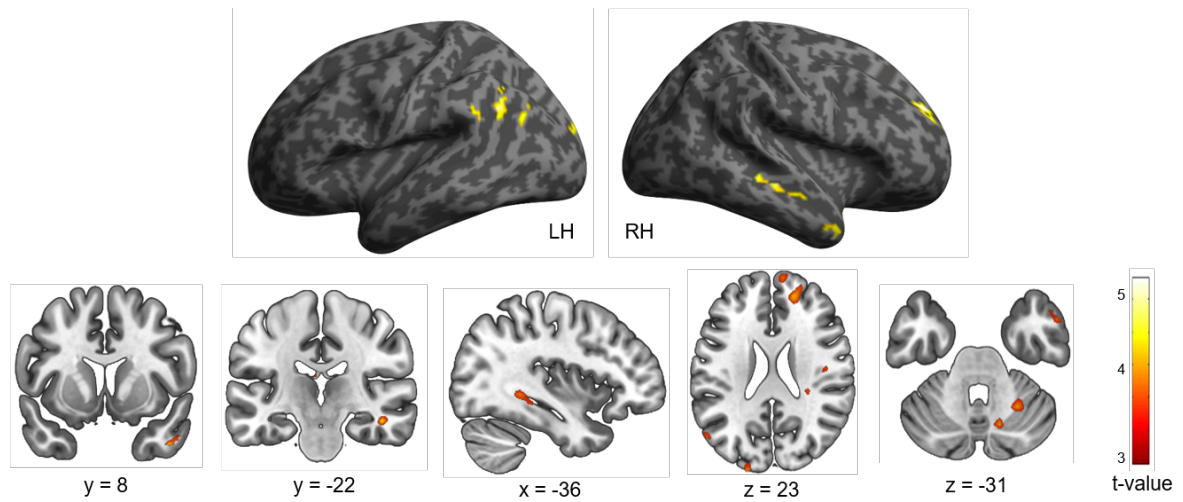

960

961 **Figure 3.** Cerebral regions whose activity for the contrast [Landmark > Control] was  
962 predicted by navigation time projected onto 3D inflated anatomical templates and 2D slices ( $p$   
963 < 0.001 uncorrected,  $k = 10$  voxels). LH: left hemisphere; RH: right hemisphere.

964

(A) Young adults: [Landmark > Control]

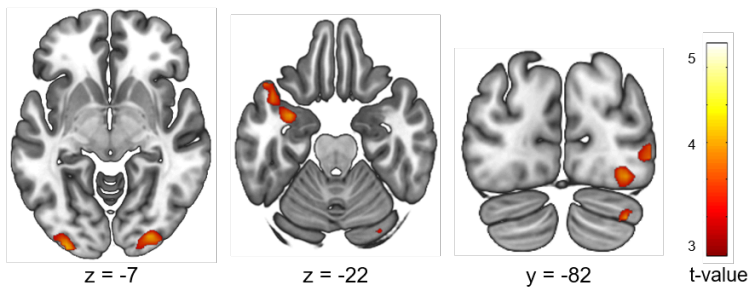

965

(B) Young vs. Older adults: [Landmark > Control]

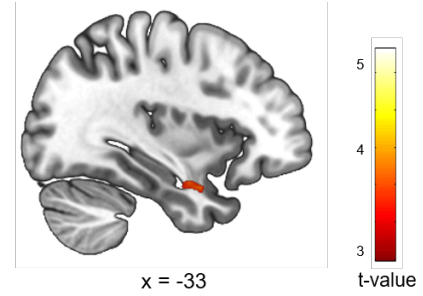

966 **Figure 4.** Cerebral regions whose activity for the contrast [Landmark > Control] was elicited  
967 by within- (A) or between-group (B) analyses projected onto 2D slices ( $p < 0.001$   
968 uncorrected,  $k = 10$  voxels).

969



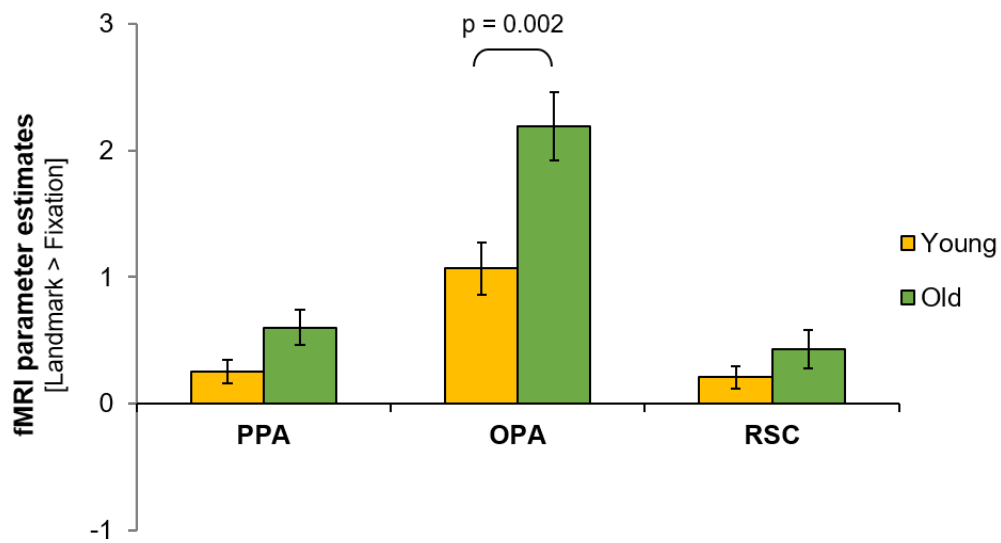

970

971 **Figure 5.** fMRI parameter estimates in the PPA, OPA, and RSC for the fMRI contrast  
972 [Landmark > Fixation] across age groups. Error bars reflect standard errors of the mean.

973

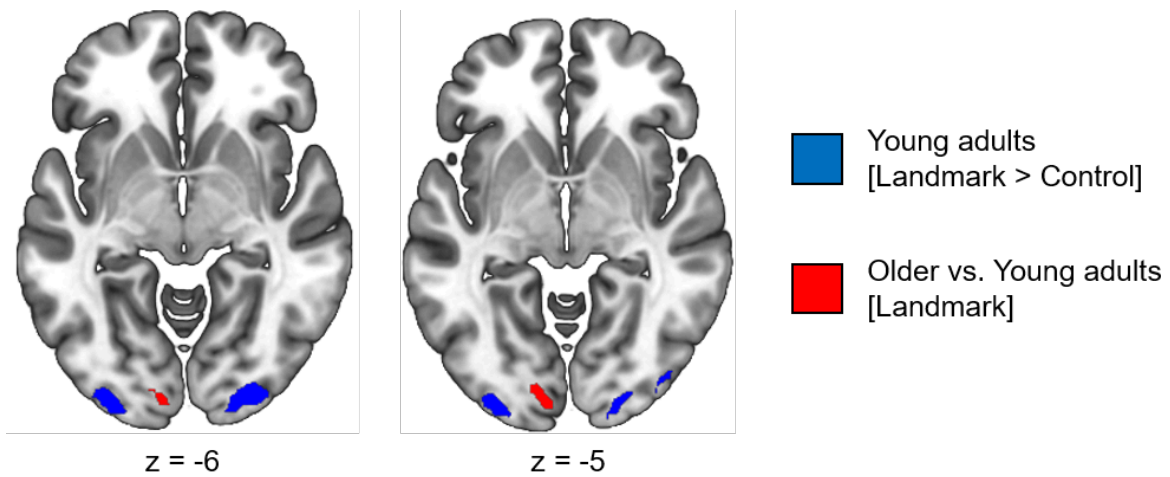

974

975 **Figure 6.** Occipital clusters recruited during the navigation task. In blue, the cortical  
976 projection of the central visual field that was elicited by the fMRI contrast [Landmark >  
977 Control] in young adults. In red, the cortical projection of the peripheral visual field that was  
978 elicited by comparing young and older adults for the fMRI contrast [Landmark].
